# Supplementary material for: Preparation of Z-scheme AgI/Bi5O7I plate with high visible light photocatalytic performance by phase transition and morphological transformation of BiOI microspheres at room temperature
Source: Royal Society of Chemistry journal article supplement (doi:10.1039/c8dt01711e), 2018-01-01
Supplement: c8dt01711e1.pdf [file c8dt01711e1.pdf]

## Supporting Information

**Preparation of Z-scheme AgI/Bi<sub>5</sub>O<sub>7</sub>I plate with high visible light  
photocatalytic performance by phase transition and morphological  
transformation of BiOI microspheres at room temperature**

Nan Yang, Xiang Lv, Suting Zhong, Danlin Qian, Sujuan Han, Dongnan Li, Xueqi Geng, Hongbiao  
Fang, Wei Jiang\*

School of Chemical Engineering, Nanjing University of Science and Technology, Nanjing 210094,  
China.

Corresponding author:

E-mail: superfine\_jw@126.com

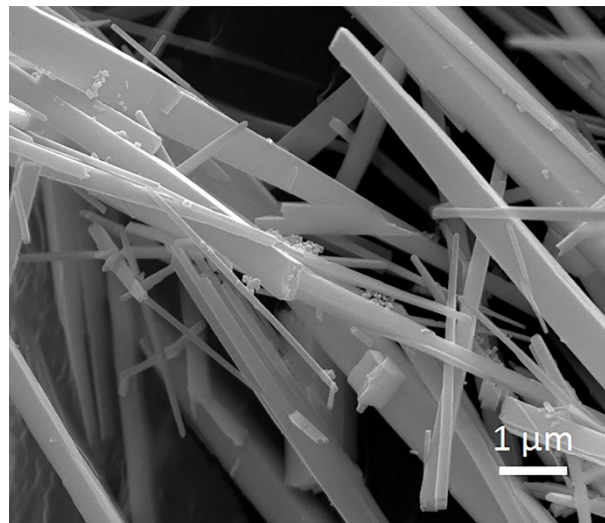

Fig. S1 SEM image of BA-4P composite

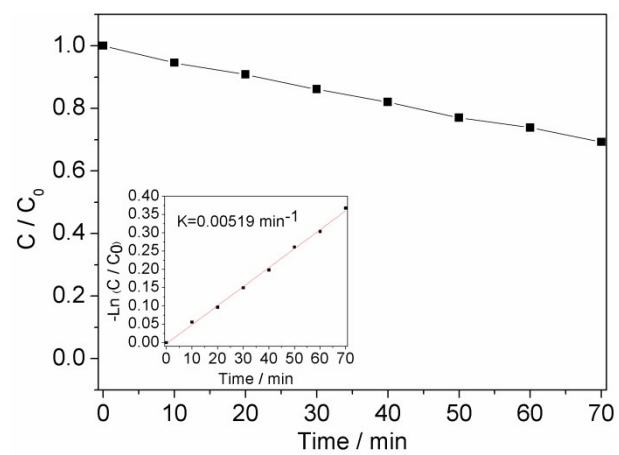

Fig. S2 (a) Photocatalytic degradation efficiency of MO by BA-4P composite (the insert is corresponding first-order kinetics plot)
